# Supplementary material
Source: PubMed Central journal article supplement (PMC5030456)
Supplement: mp2015168x5.pdf [file mp2015168x5.pdf]

## Supplementary Figure 1

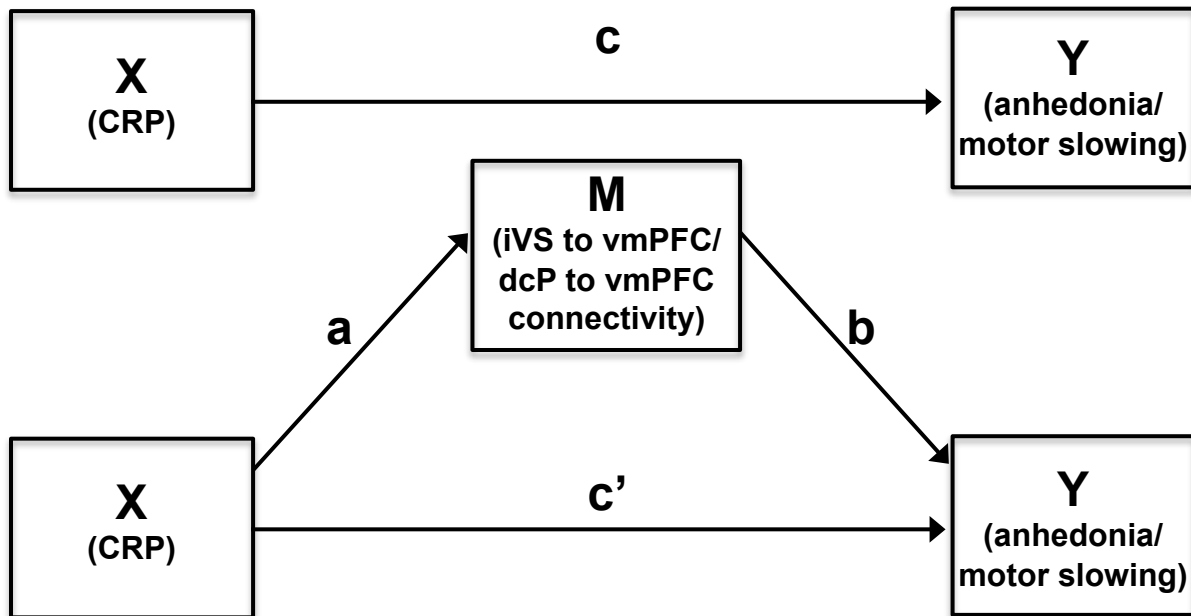

**M = Mediator**

**a = Effect of X on M**

**b = Effect of M on Y**

**c = Overall effect of X on Y ( $c' + ab$ )**

**c' = Direct effect of X on Y controlling for M ( $c - ab$ )**

**ab = Indirect effect of X on Y through M ( $c - c'$ )**
